# Supplementary material for: Lung Support Service: Implementation of a Nationwide Text Message Support Program for People with Chronic Respiratory Disease during the COVID-19 Pandemic
Source: MDPI journal article supplement (doi:10.3390/ijerph192417073), 2022-12-19
Supplement: s1 [file s1]

**Supplementary Table S1. Example text messages from Texting for Wellness: Lung Support Service.**

| <b>Message Topic</b>                                | <b>Example Text Message</b>                                                                                                                                                          |
|-----------------------------------------------------|--------------------------------------------------------------------------------------------------------------------------------------------------------------------------------------|
| Recommendations on healthy lifestyle and behaviours | Hi [pref_name] <sup>a</sup> , remember it is important to keep active - try a walk outside if possible but if not try walking around the garden or within your home                  |
| Disease self-management                             | When you are feeling breathless, follow the 3 Ps, Pause, Position, and Pursed lip breathing (stop, lean forward and breath slowly)                                                   |
| Medication adherence                                | Are you sure you're getting maximum benefit from your inhalers? For a demo on how to use your inhaler go to <a href="http://www.lungfoundation.com.au">www.lungfoundation.com.au</a> |
| COVID-19 advice                                     | If you have to go out for essential items or to visit your doctor - keep a safe distance from others i.e. at least 1.5 metres apart                                                  |

<sup>a</sup> [pref\_name]: Participants preferred name entered at program enrolment.
